# Supplementary material for: Effect of formamidinium (FA) ions on mixed ‘A’-site based bromide perovskite (APbBr3) thin films
Source: Royal Society of Chemistry journal article supplement (doi:10.1039/d2nj05052h), 2022-01-01
Supplement: d2nj05052h1.pdf [file d2nj05052h1.pdf]

## Supporting Information

For

### Effect of Formamidinium (FA) ions on the Mixed 'A'-site Based Bromide Perovskite (APbBr<sub>3</sub>) Thin Films

Deepak Aloysius<sup>1</sup>, Arindam Mondal<sup>1</sup>, Satyajit Gupta<sup>1\*</sup>, Eran Edri<sup>2</sup>, Sabyasachi Mukhopadhyay<sup>3</sup>,

<sup>1</sup>*Department of Chemistry, Indian Institute of Technology Bhilai, Chhattisgarh, India*

<sup>2</sup>*Department of Chemical Engineering, Ben-Gurion University of the Negev, Israel*

<sup>3</sup>*Department of Physics, SRM University-AP, Andhra Pradesh, India*

\*Corresponding Author; [email: satyajit@iitbhilai.ac.in](mailto:satyajit@iitbhilai.ac.in)

#### S1 Goldsmith's Tolerance factor (t) and Octahedral Factor (μ)

$$t = \frac{rA_{effective} + rBr^-}{\sqrt{2} (rPb^{2+} + rBr^-)}$$

$$\mu = \frac{rPb^{2+}}{rBr^-}$$

For PbBr<sub>6</sub><sup>4-</sup> octahedra, the 'μ' value is 0.607. To form stable BX<sub>6</sub> octahedra, 'μ' should be between 0.442 to 0.895. Also, the 't' value for FA<sub>0.5</sub>MA<sub>0.4</sub>Cs<sub>0.1</sub>PbBr<sub>3</sub> is 0.961 and that for MA<sub>0.9</sub>Cs<sub>0.1</sub>PbBr<sub>3</sub> is 0.92. For perovskites to follow a cubical structure, 't' should be between 0.813 to 1.107.

## XRD after CV analysis

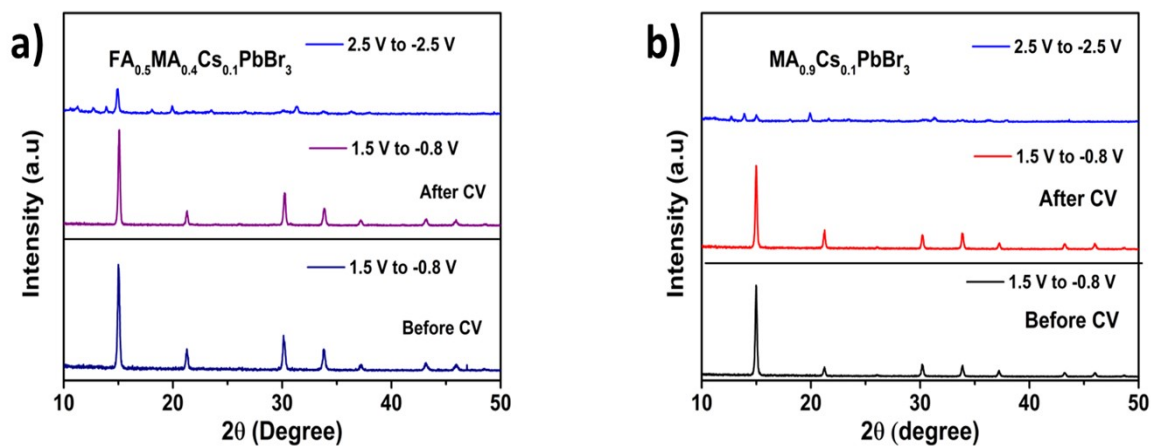

**Fig. S1** XRD after CV within electrochemical stability window (1.5 V to -0.8 V) and beyond stability window (2.5 V to -2.5 V) of **a)** MA<sub>0.9</sub>Cs<sub>0.1</sub>PbBr<sub>3</sub> and **b)** FA<sub>0.5</sub>MA<sub>0.4</sub>Cs<sub>0.1</sub>PbBr<sub>3</sub> perovskites.

## S2 Formal Potential and HOMO level determination from CV

To calibrate the electrochemical system and determine the formal potential, 1.9 mM ferrocene was dissolved in the solvent-electrolyte mixture.<sup>1</sup> The corresponding CV was measured with blank FTO using Ag/AgCl reference electrode and Pt counter electrode. We determined the formal potential by taking the average of both oxidation (1.07 V) and reduction peak potentials (-0.24 V), as shown in Fig. S2a. The HOMO energy level of both HOIPs was determined by the oxidation potential generated from the CV peak.

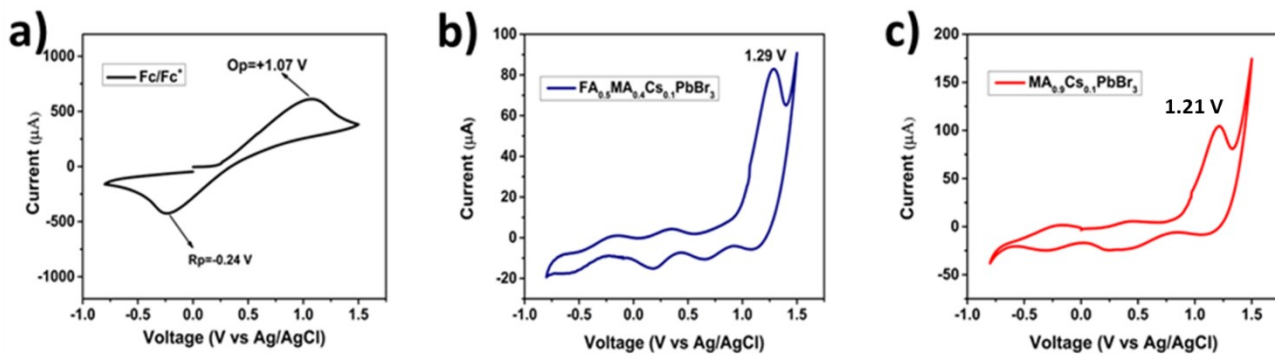

**Fig. S2** CV plots of **a)** Fc/Fc<sup>+</sup> redox couple **b)** FA<sub>0.5</sub>MA<sub>0.4</sub>Cs<sub>0.1</sub>PbBr<sub>3</sub> **c)** MA<sub>0.9</sub>Cs<sub>0.1</sub>PbBr<sub>3</sub> perovskites

The equation is  $E_{\text{HOMO}} = -e[(E_{(\text{ox})} - E_{1/2(\text{ferrocene})}) + 4.8]$  eV, where ‘e’ is the electronic charge,  $E_{(\text{ox})}$  is the oxidation peak potential and  $E_{1/2(\text{ferrocene})}$  is the formal potential obtained<sup>2</sup>. In comparison, Fc/Fc<sup>+</sup> redox reference and 4.8 eV is the HOMO energy level of ferrocene, which is already known.

Formal potential,

$$E_{(1/2)} = 1/2 [E_p(\text{o}) + E_p(\text{r})]$$

$$E_{(1/2)} = 1/2 [1.07 + (-0.24)]$$

$$= 0.41 \text{ V}$$

HOMO energy level of FA<sub>0.5</sub>MA<sub>0.4</sub>Cs<sub>0.1</sub>PbBr<sub>3</sub>,

$$E_{(\text{HOMO})} = -e[(E_{(\text{ox})} - E_{1/2(\text{ferrocene})}) + 4.8]$$

$$= -e[1.29 - 0.41] + 4.8$$

$$= -5.68 \text{ eV}$$

HOMO energy level of MA<sub>0.9</sub>Cs<sub>0.1</sub>PbBr<sub>3</sub>,

$$E_{(\text{HOMO})} = -e[(E_{(\text{ox})} - E_{1/2(\text{ferrocene})}) + 4.8]$$

$$= -e[1.21 - 0.41] + 4.8$$

$$= -5.60 \text{ eV}$$

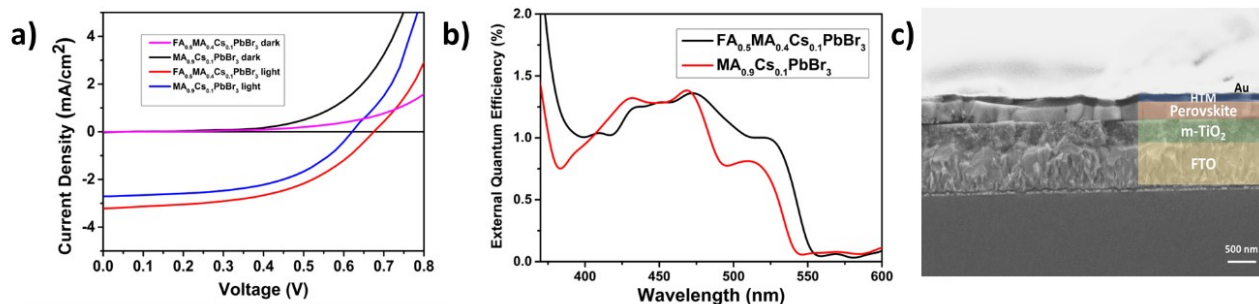

**Fig. S3** a) I-V curve b) EQE of Perovskite solar cell devices made of both FA<sub>0.5</sub>MA<sub>0.4</sub>Cs<sub>0.1</sub>PbBr<sub>3</sub> and MA<sub>0.9</sub>Cs<sub>0.1</sub>PbBr<sub>3</sub> perovskites. c) SEM image showing perovskite solar cell cross-section.

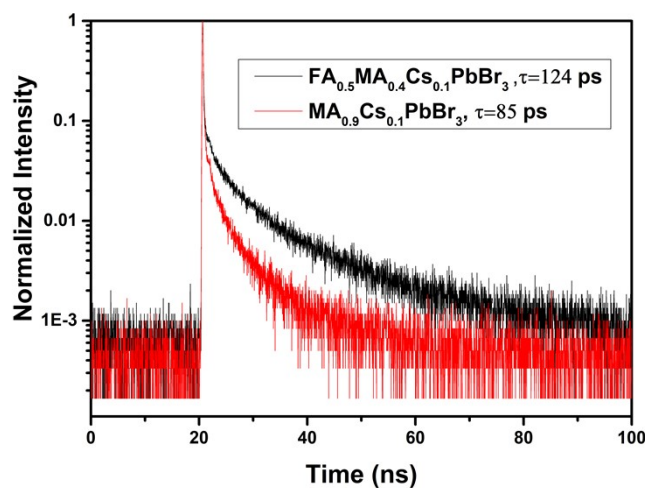

**Fig. S4:** Time-resolved PL data of both FA<sub>0.5</sub>MA<sub>0.4</sub>Cs<sub>0.1</sub>PbBr<sub>3</sub> and MA<sub>0.9</sub>Cs<sub>0.1</sub>PbBr<sub>3</sub> perovskites. The average lifetime ( $\tau$ ) of FA<sub>0.5</sub>MA<sub>0.4</sub>Cs<sub>0.1</sub>PbBr<sub>3</sub> perovskite is 124 ps and that of MA<sub>0.9</sub>Cs<sub>0.1</sub>PbBr<sub>3</sub> perovskites is 85 ps.

**Table S1** Atomic % ratio of Cs, Pb and Br elements in perovskite thin films

| Perovskite Composition                                       | Atomic % ( $\pm 4\%$ )<br>Cs: Pb: Br |
|--------------------------------------------------------------|--------------------------------------|
| $\text{FA}_{0.5}\text{MA}_{0.4}\text{Cs}_{0.1}\text{PbBr}_3$ | 3.4: 28.2: 68.1                      |
| $\text{MA}_{0.9}\text{Cs}_{0.1}\text{PbBr}_3$                | 3.7: 28.1: 68.5                      |

**Table S2** Perovskite solar cell device parameters.

| HTM  | Perovskite Composition                                       | $V_{oc}$ (V) | $J_{sc}$ ( $\text{mA}/\text{cm}^2$ ) | Fill Factor (%) | Efficiency ( $\eta$ ) |
|------|--------------------------------------------------------------|--------------|--------------------------------------|-----------------|-----------------------|
| PTAA | $\text{FA}_{0.5}\text{MA}_{0.4}\text{Cs}_{0.1}\text{PbBr}_3$ | 0.67         | -3.22                                | 51.1            | 1.11                  |
|      | $\text{MA}_{0.9}\text{Cs}_{0.1}\text{PbBr}_3$                | 0.62         | -2.71                                | 53.59           | 0.9                   |

## Notes and references:

- 1 D. Cardenas-Morcoso, A. F. Gualdrón-Reyes, A. B. Ferreira Vitoreti, M. García-Tecedor, S. J. Yoon, M. Solis de la Fuente, I. Mora-Seró and S. Gimenez, *J Phys Chem Lett*, 2019, **10**, 630–636.
- 2 A. Shafiee, M. Mat Salleh and M. Yahaya, *Sains Malays*, 2011, **40**, 173–176.
